# Supplementary material for: Microsatellite Dataset for Cultivar Discrimination in Spring Orchid (Cymbidium goeringii)
Source: Preprints.org preprint supplement (doi:10.20944/preprints202307.1263.v1), 2023-07-19
Supplement: Supplementary file 1 [file supplementary]

**Table S1.** Combined genotypes of 12 SSRs observed in *C. goeringii* cultivars

| **Cultivars** | **CG1** | **Frequency**  **(%)** | **Genotype of SSR marker2** | | | | | | | | | | | | **CMP** |
| --- | --- | --- | --- | --- | --- | --- | --- | --- | --- | --- | --- | --- | --- | --- | --- |
| **CG415** | **CG649** | **CG709** | **CG722** | **CG787** | **CG1023** | **CG1028** | **CG1085** | **CG1210** | **CG1281** | **CG1320** | **CG1400** |
| Hwanggeumso | CG1 | 64.7 | 11-11 | 15-30.1 | 17-18 | 12-20 | 24-29 | 13-13 | 15-17 | 14-15 | 29-29 | 16-16 | 10-13 | 13.1-20 | 2.369×10-15 |
| CG2 | 10.7 | 11-13 | 21-30.1 | 18-18 | 12-20 | 24-24 | 13-13 | 15-15 | 14-19 | 15-29 | 16-16 | 10-13 | 13.1-20 | 7.809×10-15 |
| Gwaneum | CG1 | 57.5 | 11-13 | 21-30.1 | 18-18 | 12-20 | 24-24 | 13-13 | 15-15 | 14-19 | 15-29 | 16-16 | 10-13 | 13.1-20 | 7.809×10-15 |
| CG2 | 10.0 | 15-15 | 14-15 | 17-17 | 12-17 | 24-24 | 13-13 | 17-17 | 15-15 | 15-17 | 8-8 | 7-12 | 13.1-13.1 | 1.346×10-14 |
| Boreumdal | CG1 | 62.0 | 11-20 | 15-15 | 17-25 | 17-17 | 24-24 | 13-13 | 6-7 | 14-14 | 6-6 | 16-16 | 10-10 | 15-20 | 1.894×10-15 |
| CG2 | 6.4 | 11-11 | 21-21 | 17-17 | 12-12 | 24-24 | 20-20 | 17-17 | 14-14 | 17-17 | 10-10 | 7-7 | 20-20 | 4.542×10-15 |
| Deungdae | CG1 | 56.2 | 11-15 | 16-16 | 17-17 | 12-12 | 24-24 | 13-13 | 7-19 | 14-38 | 15-29 | 16-16 | 12-12 | 20-21 | 1.521×10-17 |
| CG2 | 8.8 | 10-11 | 15-21 | 22-25 | 17-17 | 17-17 | 13-20 | 12-12 | 14-17 | 6-6 | 16-16 | 7-7 | 19-19 | 2.693×10-19 |
| Manmool | CG1 | 74.5 | 13-13 | 15-29.1 | 23-23 | 12-17 | 18-18 | 13-20 | 15-17 | 19-19 | 17-17 | 9-9 | 12-12 | 20-20 | 4.818×10-20 |
| CG2 | 1.6 | 13-13 | 15-25.1 | 22-22 | 12-12 | 24-24 | 20-20 | 29-29 | 14-14 | 15-17 | 10-10 | 7-7 | 19-19 | 1.408×10-16 |
| Cheonhwangso | CG1A | 41.0 | 11-19 | 14-15 | 17-34 | 12-12 | 24-24 | 13-13 | 17-17 | 15-15 | 12-12 | 16-16 | 12-12 | 20-20 | 1.483×10-13 |
| CG1B | 29.8 | 11-11 | 15-29.1 | 17-34 | 12-20 | 24-24 | 13-25 | 17-17 | 16-16 | 17-17 | 16-16 | 7-12 | 13.1-20 | 1.970×10-14 |
| CG2 | 3.7 | 11-13 | 21-30.1 | 18-18 | 12-20 | 24-24 | 13-13 | 15-15 | 14-19 | 15-29 | 16-16 | 10-13 | 13.1-20 | 7.809×10-15 |
| Daehongbo | CG1 | 61.8 | 13-22 | 15-15 | 17-18 | 20-20 | 24-24 | 13-13 | 17-17 | Null | 15-15 | 16-16 | 7-7 | 19-19 | 8.890×10-10 |
| CG2 | 6.3 | 13-13 | 15-15 | 17-25 | 12-13 | 24-24 | 13-18 | 7-7 | 14-14 | 12-12 | 10-16 | 10-10 | 13.1-20 | 4.601×10-16 |
| Cheonsoo | CG1 | 70.6 | 11-13 | 14-15 | 18-18 | 17-20 | 24-24 | 20-20 | 17-17 | 14-14 | 15-15 | 10-16 | 7-12 | 20-20 | 7.999×10-12 |
| CG2 | 7.0 | 12-20 | 17-17 | 18-22 | 11-11 | 23-23 | 17-17 | 16-23 | 14-20 | 14-27 | 29-29 | 12-12 | 23.1-23.1 | 4.192×10-33 |
| Cheonjong | CG1 | 76.0 | 11-11 | 15-19 | 17-17 | 12-20 | 24-24 | 13-13 | 6-30 | 14-14 | 15-15 | 9-9 | 10-15 | 13.1-20 | 1.742×10-14 |
|  | CG2 | 4.0 | 11-13 | 15-19 | 17-23 | 20-22 | 24-24 | 13-13 | 17-30 | 14-14 | 15-15 | 9-9 | 10-10 | 20-23.1 | 5.161×10-15 |
| Hongdaewang | CG1 | 51.4 | 13-13 | 15-33.1 | 17-22 | 12-20 | 24-24 | 19-19 | 30-30 | 14-14 | 6-15 | 16-16 | 6-7 | 19-20 | 1.152×10-14 |
| CG2 | 7.3 | 11-15 | 23-34.1 | 17-22 | 11-11 | 24-24 | 13-13 | 15-17 | 22-22 | 15-17 | 9-16 | 7-7 | 17-19 | 2.363×10-16 |
| Cheonunso | CG1 | 57.1 | 13-13 | 15-15 | 18-18 | 30-30 | Null | 26-26 | 17-17 | 14-14 | 15-15 | 16-16 | 7-7 | 10.1-13.1 | 3.505×10-17 |
| CG2 | 4.1 | 13-15 | 15-15 | 17-25 | 12-17 | 24-24 | 13-13 | 17-17 | 14-14 | 15-15 | 16-16 | 6-7 | 19-20 | 6.306×10-10 |
| Hwansaeng | CG1 | 70.5 | 13-13 | 26.1-30.1 | 18-18 | 11-11 | Null | 13-13 | 6-12 | 14-15 | 17-29 | 16-16 | 7-9 | 20-20 | 8.045×10-16 |
|  | CG2 | 5.3 | 10-11 | 15-21 | 22-25 | 17-17 | 17-17 | 13-20 | 12-12 | 14-17 | 6-6 | 16-16 | 7-7 | 19-19 | 2.693×10-19 |
| Wonmyoung | CG1 | 91.4 | 11-13 | 15-15 | 22-22 | 11-12 | 24-24 | 13-20 | 17-17 | 15-15 | 15-15 | 16-16 | 12-12 | 13.1-13.1 | 4.943×10-12 |
| CG2 | 1.1 | 11-15 | 25.1-25.1 | 14-24 | 20-27 | Null | 12-12 | 7-7 | 9-9 | 6-8 | 11-12 | 12-12 | 15-19 | 1.168×10-33 |
| Irwolhwa | CG1 | 61.5 | 11-19 | 15-15 | 17-34 | 12-17 | 22-24 | 13-13 | 15-15 | 14-14 | 15-33 | 9-9 | 7-7 | 19-19 | 1.346×10-14 |
|  | CG2 | 11.0 | 15-22 | 15-15 | 17-22 | 12-12 | 22-22 | 13-13 | 17-30 | 14-15 | 15-15 | 9-17 | 12-12 | 20-20 | 1.151×10-13 |
| Taehongso | CG1 | 73.6 | 11-13 | 15-20 | 17-17 | 12-20 | 22-22 | 20-20 | 6-6 | 14-14 | 15-28 | 9-16 | 12-12 | 15-15 | 2.074×10-17 |
|  | CG2 | 3.3 | 13-22 | 20-20 | 17-17 | 12-12 | 25-25 | 13-20 | 17-25 | 14-15 | 15-15 | 16-16 | 6-7 | 20-20 | 3.576×10-16 |
| Munsubong | CG1 | 61.9 | 13-13 | 25.1-29.1 | 17-22 | 12-12 | 22-24 | 20-20 | 15-17 | 14-19 | 12-15 | 16-16 | 7-12 | 13.1-18 | 8.785×10-15 |
|  | CG2 | 7.1 | 13-22 | 14-14 | 16-32 | 17-17 | 18-22 | 13-13 | 17-29 | Null | 12-15 | 10-16 | 12-12 | 19-19 | 2.557×10-17 |
| Agassi | CG1 | 65.4 | 13-22 | 15-15 | 17-17 | 12-20 | 24-24 | 13-20 | 15-17 | 16-16 | 6-15 | 10-17 | 7-12 | 19-19 | 1.209×10-14 |
|  | CG2 | 9.0 | 12-13 | 15-29.1 | 12-17 | 11-12 | 22-24 | 13-13 | 15-17 | 14-16 | 17-27 | 9-16 | 7-10 | 19-20 | 2.862×10-14 |
| Geummaek | CG1 | 77.9 | 13-13 | 15-29.1 | 17-22 | 11-12 | 22-25 | 13-20 | 6-12 | 19-19 | 12-15 | 10-16 | 10-12 | 19-20 | 2.614×10-15 |
|  | CG2 | 5.9 | 13-13 | 32.1-32.1 | 24-25 | 12-20 | 18-24 | 13-13 | 15-17 | Null | 8-15 | 16-16 | 7-12 | 10.1-21 | 4.902×10-18 |
| Haeoreum | CG1 | 80.6 | 11-13 | 14-14 | 25-25 | 11-11 | 25-25 | 20-20 | 17-17 | 14-14 | 17-17 | 9-9 | 7-7 | 13.1-13.1 | 8.255×10-17 |
| CG2 | 6.0 | 11-22 | 29.1-33.1 | 17-22 | 12-12 | 17-24 | 28-28 | 15-30 | 14-19 | 15-15 | 16-16 | 10-10 | 23.1-23.1 | 8.350×10-18 |
| Okro | CG1 | 89.4 | 11-13 | 15-20 | 17-17 | 12-22 | 24-24 | 13-13 | 7-17 | 14-15 | 12-15 | 16-16 | 6-12 | 13.1-13.1 | 2.567×10-12 |
| CG2 | 3.0 | 11-18 | 15-15 | 13-18 | 21-21 | 16-16 | 20-20 | 6-26 | 15-15 | 9-15 | 9-26 | 12-12 | 14-23 | 1.993×10-27 |
| Sagye | CG1 | 80.0 | 13-15 | 15-26.1 | 18-26 | 12-12 | 16-22 | 13-25 | 17-30 | 14-15 | 6-17 | 9-16 | 7-12 | 15-15 | 3.772×10-18 |
|  | CG2 | 1.5 | 13-15 | 28.1-28.1 | 13-13 | 12-12 | 18-18 | 20-20 | 12-19 | 14-14 | 15-15 | 10-10 | 12-12 | 19-19 | 9.950×10-24 |
| Chaeun | CG1 | 74.6 | 13-13 | 29.1-29.1 | 16-16 | 12-12 | 22-24 | 13-13 | 15-15 | 14-14 | 17-17 | 9-16 | 7-13 | 13.1-20 | 5.165×10-15 |
|  | CG2 | 1.7 | 11-13 | 15-25.1 | 17-18 | 11-12 | 24-24 | 13-20 | 17-17 | 14-14 | 6-15 | 9-16 | 7-12 | 19-20 | 5.317×10-10 |
| Cheongeumso | CG1 | 81.0 | 13-19 | 15-29.1 | 17-25 | 12-17 | 24-25 | 13-13 | 17-29 | 14-24 | 15-15 | 16-16 | 7-7 | 13.1-19 | 4.141×10-14 |
|  | CG2 | 3.4 | 11-15 | 15-24.1 | 18-34 | 20-22 | 24-25 | 13-20 | 15-15 | 15-20 | 6-29 | 9-16 | 12-13 | 13.1-13.1 | 8.249×10-20 |
| Seongyeong | CG1 | 72.4 | 11-11 | 15-29.1 | 13-17 | 12-20 | 17-24 | 13-13 | 17-17 | 14-14 | 15-29 | 9-16 | 6-6 | 20-20 | 1.282×10-13 |
| CG2 | 7.0 | 13-19 | 15-15 | 18-22 | 20-22 | 22-22 | 13-13 | 7-17 | 14-14 | 6-17 | 16-17 | 15-15 | 19-19 | 1.524×10-17 |
| Wonhongseol | CG1 | 86.0 | 13-13 | 16-34.1 | 13-17 | 12-17 | 24-24 | 13-20 | 7-17 | 14-19 | 11-17 | 9-9 | 7-7 | 13.1-20 | 6.960×10-16 |
|  | CG2 | 3.5 | 11-13 | 13-14 | 16-19 | 14-19 | 14-16 | 10-23 | 6-7 | 11-11 | 9-28 | 11-11 | 5-5 | 18-25 | 1.212×10-48 |
| Donglyeon | CG1 | 60.7 | 15-15 | 15-15 | 17-25 | 12-20 | 22-24 | 13-13 | 15-15 | 14-14 | 15-15 | 16-16 | 12-12 | 20-20 | 6.555×10-12 |
| CG2 | 5.4 | 13-15 | 20-20 | 22-22 | 12-12 | 24-24 | 13-20 | 7-15 | 14-14 | 15-29 | 9-16 | 7-7 | 19-20 | 1.466×10-13 |
| Jinna | CG1 | 78.2 | 10-13 | 14-29.1 | 18-18 | 11-17 | Null | 13-13 | 7-7 | 14-14 | 15-15 | 16-16 | 7-7 | 19-19 | 1.674×10-12 |
| CG2 | 3.6 | 12-22 | 17-17 | 13-19 | 12-22 | 25-25 | 20-20 | 7-7 | 15-15 | 6-29 | 9-10 | 10-12 | 20-28 | 1.067×10-24 |
| Jeonju-Hwangu | CG1 | 69.8 | 13-15 | 15-15 | 34-34 | 12-20 | Null | 13-13 | 7-24 | 14-14 | 12-12 | 16-16 | 7-7 | 15-19 | 2.329×10-14 |
| CG2 | 18.9 | 13-13 | 14-15 | 17-22 | 22-23 | Null | 19-19 | 17-17 | 14-14 | 6-6 | 16-16 | 7-12 | 10.1-25 | 1.551×10-17 |
| Cheonbulso | CG1 | 76.9 | 11-19 | 23-26.1 | 25-34 | 20-20 | 24-24 | 13-13 | 30-30 | 14-14 | 15-15 | 16-16 | 12-12 | 20-20 | 5.245×10-16 |
| CG2 | 5.8 | 13-13 | 25.1-25.1 | 32-32 | 12-12 | 22-22 | 20-20 | 17-17 | 14-14 | 15-15 | 16-16 | 7-7 | 13.1-13.1 | 5.595×10-16 |
| Bulkkot | CG1 | 74.5 | 10-11(10) | 15-15 | 17-17 | 12-12 | 24-24 | 13-13 | 17-17 | Null | 12-13(14) | 10-16 | 12-12 | 19-19 | 5.094×10-13 |
|  | CG2 | 4.3 | 13-13 | 14-25.1 | 17-22 | 12-18 | 24-24 | 13-13 | 7-17 | 9-10 | 16-27 | 16-16 | 10-12 | 23.1-23.1 | 1.583×10-20 |
| Hallasan | CG1A | 47.5 | 11-15 | 15-15 | 17-17 | 17-17 | 24-24 | 13-13 | 12-12 | 14-14 | 17-17 | 10-16 | 10-10 | 13.1-13.1 | 3.031×10-14 |
| CG1B | 30.0 | 11-11 | 15-15 | 17-17 | 17-17 | 24-24 | 13-13 | 17-17 | 14-14 | 15-17 | 16-16 | 10-10 | 13.1-13.1 | 1.720×10-11 |
| CG2 | 7.5 | 11-11 | 14-14 | 17-22 | 12-13 | 17-24 | 13-20 | 17-17 | 14-14 | 6-15 | 16-16 | 7-7 | 19-23.1 | 6.909×10-14 |
| Cheonsa | CG1 | 59.0 | 11-13 | 15-25.1 | 17-18 | 11-12 | 24-24 | 13-20 | 17-17 | 14-14 | 6-15 | 9-16 | 7-12 | 19-20 | 5.317×10-10 |
| CG2 | 12.8 | 12-20 | 17-17 | 18-22 | 11-11 | 23-23 | 17-17 | 16-23 | 14-20 | 14-27 | 25-25 | 12-12 | 23.1-23.1 | 9.337×10-35 |
| Susa | CG1 | 76.3 | 13-22 | 14-20 | 13-22 | 12-17 | 15-22 | 13-13 | 17-17 | 14-15 | 12-15 | 10-16 | 7-7 | 13.1-19 | 3.073×10-15 |
| CG2 | 7.9 | 11-13 | 29.1-29.1 | 17-17 | 11-17 | 24-24 | 13-25 | 17-17 | 15-15 | 17-17 | 9-16 | 7-10 | 13.1-13.1 | 2.472×10-14 |
| Hongwon | CG1 | 66.7 | 13-13 | 15-15 | 19-22 | 12-20 | 24-24 | 19-19 | 30-30 | 14-14 | 15-29 | 16-16 | 7-7 | 19-19 | 8.215×10-15 |
| CG2 | 5.6 | 11-13 | 15-15 | 25-25 | 11-11 | Null | 13-13 | 12-15 | 14-14 | 29-29 | 10-16 | 7-7 | 13.1-13.1 | 2.207×10-13 |
| Geumhaso | CG1 | 75.0 | 11-19 | 14-34.1 | 18-26 | 12-17 | 24-24 | 13-13 | 6-17 | 14-19 | 15-17 | 16-16 | 7-13 | 13.1-20 | 2.886×10-15 |
|  | CG2 | 6.3 | 14-15 | 15-33.1 | 26-34 | 11-11 | Null | 13-13 | 17-17 | 14-14 | 15-15 | 10-10 | 7-13 | 20-20 | 5.273×10-17 |
| Honggwiin | CG1 | 63.3 | 13-13 | 15-34.1 | 22-22 | 12-20 | 24-24 | 13-13 | 7-12 | 14-14 | 17-17 | 16-16 | 10-10 | 13.1-13.1 | 8.121×10-14 |
| CG2 | 16.7 | 13-22 | Null | 18-20 | 20-20 | 20-20 | 20-20 | 7-7 | 22-22 | 20-20 | 9-9 | 12-12 | 22-22 | 8.185×10-32 |
| Hwangmae | CG1 | 75.9 | 13-13 | 15-15 | 17-17 | 11-22 | 24-24 | 13-20 | 17-30 | 13-14 | 15-15 | 16-16 | 7-7 | 20-23.1 | 1.223×10-11 |
| Migeum | CG1 | 65.4 | 11-19 | 15-15 | 22-25 | 11-11 | 19-24 | 13-20 | 6-6 | 14-14 | 17-17 | 10-10 | 7-7 | 19-20 | 1.482×10-16 |
| Dongcheon | CG1 | 79.1 | 13-13 | 15-15 | 18-18 | 20-20 | 24-24 | 13-13 | 12-17 | 14-14 | 15-15 | 16-16 | 7-7 | 13.1-13.1 | 7.457×10-16 |
| Unmuryeong | CG1 | 66.7 | 13-13 | 15-29.1 | 16-17 | 11-11 | 17-24 | 13-20 | 12-12 | 14-14 | 12-12 | 16-16 | 10-10 | 19-19 | 1.595×10-15 |
| Sacheonwang | CG1 | 40.9 | 15-15 | 15-15 | 13-13 | 12-12 | 24-24 | 13-13 | 6-7 | 14-14 | 15-15 | 16-16 | 7-13 | 20-20 | 4.429×10-13 |
| Songjeong | CG1 | 75.0 | 11-12 | 19-30.1 | 17-18 | 12-20 | 17-18 | 13-13 | 17-17 | 24-25 | 29-30 | 16-16 | 13-13 | 13.1-20 | 3.106×10-24 |
| Wangjungwang | CG1 | 56.3 | 13-15 | 15-15 | 18-25 | 12-22 | 24-24 | 13-29 | 7-17 | 15-19 | 15-17 | 17-17 | 10-13 | 13.1-20 | 1.167×10-17 |
| Hojeong | CG1 | 53.8 | 11-11 | 15-23 | 13-22 | 11-12 | 24-24 | 13-13 | 16-16 | 14-22 | 15-15 | 9-9 | 12-13 | 13.1-20 | 4.258×10-17 |
| Saebyeok | CG1 | 75.0 | 11-15 | 15-32.1 | 17-18 | 11-22 | 22-24 | 13-13 | 30-30 | 14-14 | 15-15 | 16-16 | 12-12 | 19-20 | 8.840×10-14 |
| Taegeukseon | CG1 | 63.6 | 13-15 | 15-15 | 17-25 | 12-17 | 24-24 | 13-13 | 17-17 | 14-14 | 15-15 | 16-16 | 6-7 | 19-20 | 6.306×10-10 |
| Youngchoonso | CG1 | 81.8 | 15-15 | 14-15 | 17-17 | 12-17 | 24-24 | 13-13 | 17-17 | 15-15 | 15-17 | 8-8 | 7-12 | 13.1-13.1 | 1.346×10-14 |
| Geumsusan | CG1 | 45.5 | 13-22 | 14-14 | 17-17 | 17-20 | 25-25 | 13-13 | 17-17 | 15-15 | 15-17 | 9-9 | 7-7 | 19-19 | 4.971×10-15 |
| Jinjusu | CG1 | 100.0 | 12-13 | 15-29.1 | 12-17 | 11-12 | 22-24 | 13-13 | 15-17 | 14-16 | 17-27 | 9-16 | 7-10 | 19-20 | 2.862×10-14 |
| Sinmun | CG1 | 90.0 | 13-15 | 15-29.1 | 18-18 | 17-23 | 24-24 | 13-13 | 6-17 | 14-14 | 15-17 | 16-16 | 7-7 | 17-20 | 1.078×10-12 |
| Sebo | CG1 | 33.3 | 13-13 | 20-35.1 | 18-34 | 12-22 | 22-22 | 13-13 | 7-18 | 15-15 | 17-28 | 9-16 | 6-7 | 13.1-17 | 1.087×10-20 |
| Silla | CG1 | 100.0 | 11-13 | 20-20 | 17-17 | 12-12 | 24-24 | 20-20 | 17-17 | 14-14 | 15-15 | 16-16 | 7-12 | 13.1-18 | 6.238×10-14 |
| Ilchulhwa | CG1 | 50.0 | 13-13 | 32.1-32.1 | 24-25 | 12-20 | 18-24 | 13-13 | 15-17 | Null | 8-15 | 16-16 | 7-12 | 10.1-21 | 4.902×10-18 |
| Cheongoksan | CG1 | 100.0 | 16-16 | 14-14 | 19-20 | 11-20 | 12-12 | 13-20 | 6-6 | 8-20 | 13-13 | 10-10 | 7-7 | 20-20 | 4.496×10-36 |
| Hongun | CG1 | 100.0 | 13-13 | 21-21 | 18-18 | 20-20 | 22-24 | 25-25 | 17-17 | 15-15 | 15-15 | 16-16 | 7-13 | 20-20 | 4.016×10-17 |
| Jangdan | CG1 | 66.6 | 11-15 | 23-34.1 | 17-22 | 11-11 | 24-24 | 13-13 | 15-17 | 22-22 | 15-17 | 9-16 | 7-7 | 17-19 | 2.363×10-16 |
| Miryeon | CG1 | 66.7 | 15-22 | 14-15 | 17-22 | 12-12 | 22-22 | 13-13 | 17-30 | 14-15 | 15-15 | 9-17 | 12-12 | 20-20 | 4.636×10-14 |
| Geumgangbo | CG1 | 100.0 | 13-15 | 15-29.1 | 18-18 | 17-23 | 24-24 | 13-13 | 6-17 | 14-14 | 15-17 | 16-16 | 7-7 | 17-20 | 1.078×10-12 |
| Hojin | CG1 | 100.0 | 13-13 | 25.1-25.1 | 16-16 | 11-11 | 25-25 | Null | 17-17 | 19-19 | 12-15 | 10-16 | 12-12 | 19-19 | 4.440×10-18 |
| Hyangsu | CG1 | 100.0 | 13-22 | 14-14 | 16-32 | 17-17 | 18-22 | 13-13 | 17-29 | Null | 12-15 | 10-16 | 12-12 | 19-19 | 2.557×10-17 |
| Namhaeso | CG1 | 50.0 | 11-11 | 15-21 | 13-17 | 12-20 | 22-24 | 13-13 | 17-17 | 15-15 | 15-17 | 10-15 | 7-12 | 17-19 | 2.578×10-15 |
| Juhongseong | CG1 | 100.0 | 13-13 | 14-25.1 | 17-22 | 12-18 | 24-24 | 13-13 | 7-17 | Null | 16-27 | 16-16 | 10-12 | 23.1-23.1 | 1.072×10-16 |
| Chanbo | CG1 | 72.5 | 12-20 | 17-17 | 18-22 | 11-11 | 23-23 | 17-17 | 16-23 | 14-20 | 14-27 | 29-29 | 12-12 | 23.1-23.1 | 4.192×10-33 |
| Jilbugeum | CG1 | 92.9 | 18-18 | 17-17 | 18-18 | 12-12 | 20-25 | 21-28 | 7-23 | 15-15 | 15-15 | 9-9 | 12-12 | 23.1-23.1 | 3.138×10-25 |
| Changseongjihwa | CG1 | 92.3 | 20-20 | Null | 28-28 | 11-11 | 18-18 | 17-17 | 6-6 | 9-14 | 9-27 | 9-9 | 7-12 | 14-23 | 9.962×10-29 |
| Hobakjeon | CG1 | 63.6 | 18-22 | 17-17 | 22-22 | 16-17 | 17-25 | 20-28 | 17-17 | 20-20 | 13-15 | 9-9 | 7-8 | 14-23.1 | 9.868×10-28 |
| Sumunsan | CG1 | 87.5 | 19-19 | Null | 18-19 | 16-17 | 25-25 | 20-20 | 6-19 | 15-22 | 9-9 | 9-9 | 12-12 | 14-23.1 | 2.083×10-25 |
| Hwanguhajeong | CG1 | 60.0 | 11-15 | 25.1-25.1 | 14-24 | 20-27 | Null | 12-12 | 7-7 | 9-9 | 6-8 | 11-12 | 12-12 | 15-19 | 1.168×10-33 |

1 CG2 profiles were provided for cultivars with a sample number of 30 or more.

2 Null: failed loci for genotyping.

Abbreviations: CG: combined genotype, CMP: combined matching probability, SSR: simple sequence repeats.
